# Supplementary material for: Pathogenic Variants of SLC22A12 (URAT1) and SLC2A9 (GLUT9) in Spanish Patients with Renal Hypouricemia: Founder Effect of SLC2A9 Variant c.374C>T; p.(T125M)
Source: MDPI journal article supplement (doi:10.3390/ijms24098455), 2023-05-08
Supplement: s1 [file s1]

## Supplementary material

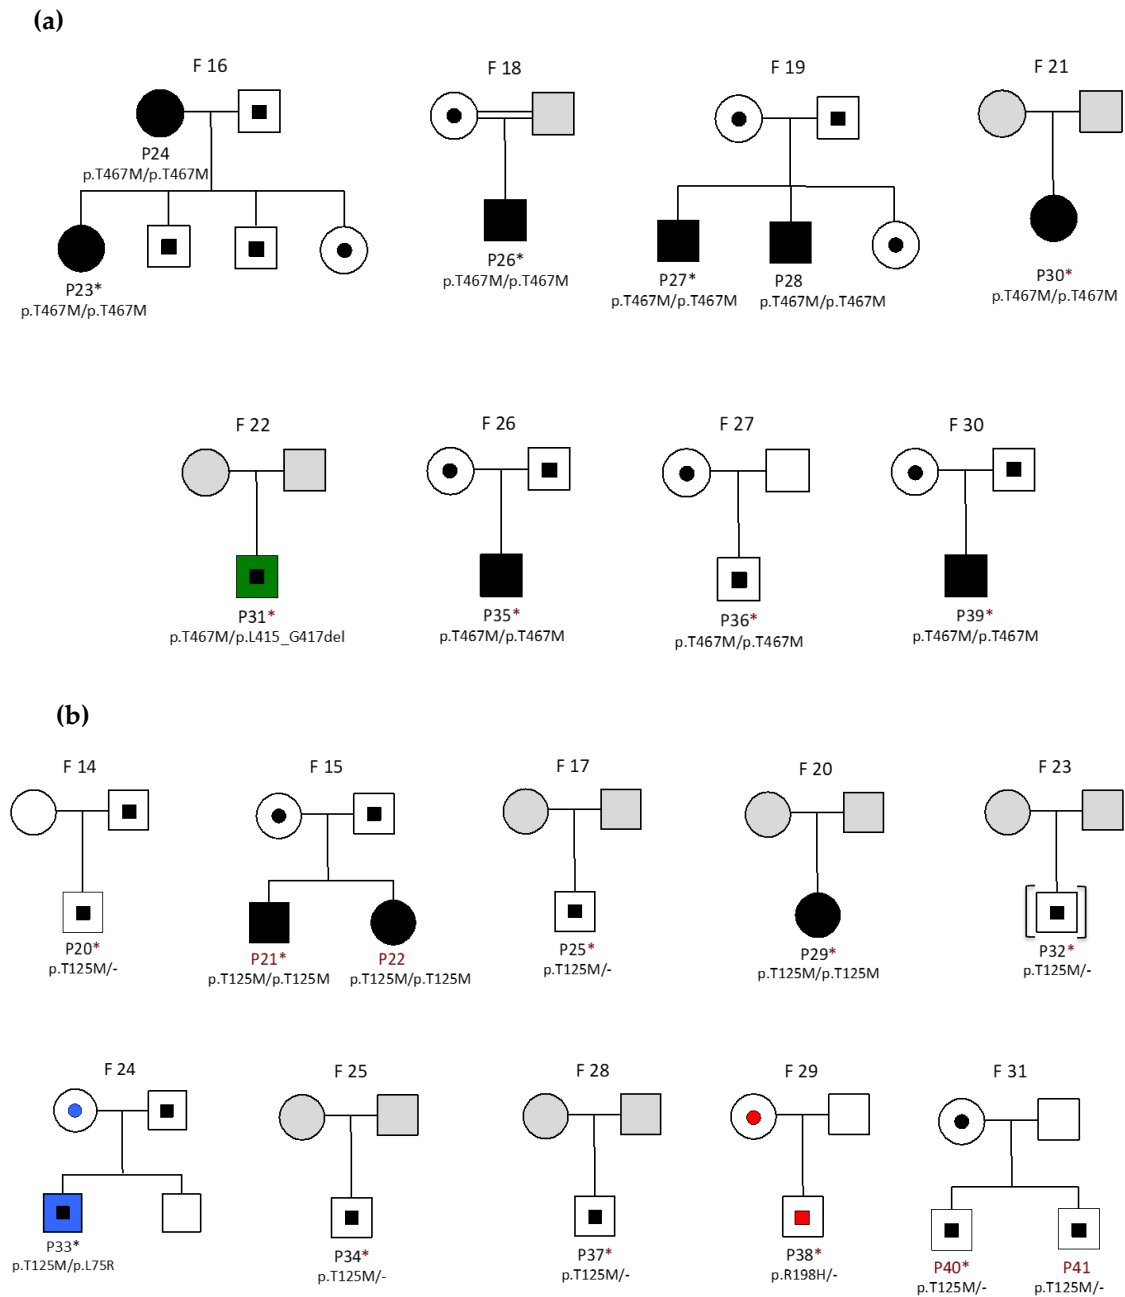

**Figure S1.** Pedigrees of families with RHUC type 1 (a) and type 2 (b) showing segregation of *SLC22A12* and *SLC2A9* variants, respectively. Asterisks indicate probands in each pedigree. Circles and squares correspond to female and male individuals, respectively. Filled circles and squares represent homozygous or compound heterozygous subjects; filled circles and squares within open frames represent heterozygous individuals; unfilled symbols denote subjects without mutation; grey symbols represent family members who were not available for genetic analysis. Double line indicates paternal consanguinity. F, family. Brackets indicates adoption. Black symbols indicate subjects harbouring the most frequent mutation in RHUC type 1 or RHUC type 2. Green symbols indicate individual

carrying mutation p.(L415\_G417del). Blue symbols indicate individuals carrying mutation p.L75R. red symbols represent individuals harbouring novel mutation p.R198H.

**Table S1:** Primers used for PCR amplification of the variants genotyped for haplotype analysis. Human assembly GRCh38.p13

|       | Reference SNP | Position      | Primers sequences (5' – 3')                                            |
|-------|---------------|---------------|------------------------------------------------------------------------|
| SNP_1 | rs6855911     | chr4:9934286  | rs6855911F: CTCCCAATCAAATCCCCTCT<br>rs6855911R: TGAAAAGCCATCTGTGGTCA   |
| SNP_2 | rs7442295     | chr4:9964756  | rs7442295F: GGCTGGGGCTTAAAATCACT<br>rs7442295R: GAGAGGCAAGAGGGCTGTC    |
| SNP_3 | rs10011206    | chr4:9990331  | rs10011206F: ATGAGGGAACGGAAAGTGTG<br>rs10011206R: GCCCTTCAACGTAAGAACCA |
| SNP_4 | rs7696536     | chr4:9998612  | rs7696536F: GCAGTGTGTTGTCTGCTGGT<br>rs7696536R: GGCTGTTTCTCGTCTGGAGT   |
| SNP_5 | rs3756236     | chr4:10011839 | rs3756236F: GCCAATTGGAGCTAGTCACTG<br>rs3756236R: GAAAAGGGAGGAGGCTCTTG  |
| SNP_6 | rs13133766    | chr4:10018108 | rs13133766F: CATCCATCACTCCACCTTCC<br>rs13133766R: CACATTGTGCCTCTGGTTTG |

**Table S2.** Allele frequencies distribution of the selected SNPs markers in cases and controls.

|           | Allele | Controls (%) | RH patients (%) |
|-----------|--------|--------------|-----------------|
| SNP_1 G/A | G      | 0.5          | 0.89            |
| SNP_2 A/G | A      | 0.5          | 0.86            |
| SNP_3 C/T | C      | 0.75         | 0.92            |
| SNP_4 G/T | G      | 0.75         | 0.92            |
| SNP_5 T/A | T      | 0.67         | 0.94            |
| SNP_6 C/T | C      | 0.71         | 0.94            |
